# Supplementary material
Source: publisher site journal article supplement (https://www.jstage.jst.go.jp/article/geochemj/48/4/48_2.0314/_supplement/_download/48_2.0314_1.pdf)
Supplement: Supplementary file 1 [file 48_2.0314_1.pdf]

# Supplementary Table S1

Amount (mm),  $\delta D$  and  $\delta^{18}O$  (‰) and d-value of precipitation collected monthly as well as the sum of amount and the annual means of  $\delta D$  and  $\delta^{18}O$  and d-value at Akita and other 4 localities in Japan.

## Akita (39°43'N, 140°05'E)

| Year | Month     | Prec. | $\delta D$ | $\delta^{18}O$ | d  | Year | Month     | Prec. | $\delta D$ | $\delta^{18}O$ | d  | Year | Month     | Prec. | $\delta D$ | $\delta^{18}O$ | d  |
|------|-----------|-------|------------|----------------|----|------|-----------|-------|------------|----------------|----|------|-----------|-------|------------|----------------|----|
| 1981 | 1         | -     | -          | -              | -  | 1982 | 1         | 150   | -54        | -10.3          | 28 | 1983 | 1         | 90    | -60        | -10.9          | 27 |
|      | 2         | -     | -          | -              | -  |      | 2         | 80    | -59        | -11.0          | 29 |      | 2         | 70    | -72        | -12.1          | 25 |
|      | 3         | -     | -          | -              | -  |      | 3         | 120   | -59        | -9.2           | 15 |      | 3         | 90    | -96        | -13.9          | 15 |
|      | 4         | -     | -          | -              | -  |      | 4         | 180   | -78        | -11.3          | 12 |      | 4         | 150   | -49        | -7.4           | 10 |
|      | 5         | -     | -          | -              | -  |      | 5         | 250   | -55        | -7.8           | 7  |      | 5         | 100   | -67        | -9.2           | 7  |
|      | 6         | 220   | -72        | -10.0          | 8  |      | 6         | 100   | -78        | -10.8          | 8  |      | 6         | 110   | -58        | -8.3           | 8  |
|      | 7         | 360   | -54        | -7.7           | 8  |      | 7         | 120   | -67        | -9.1           | 6  |      | 7         | 190   | -64        | -9.1           | 9  |
|      | 8         | 380   | -53        | -7.8           | 9  |      | 8         | 120   | -57        | -7.6           | 4  |      | 8         | 150   | -59        | -8.4           | 8  |
|      | 9         | 100   | -69        | -9.6           | 8  |      | 9         | 170   | -52        | -7.2           | 6  |      | 9         | 170   | -65        | -9.3           | 9  |
|      | 10        | 240   | -48        | -8.4           | 19 |      | 10        | 150   | -43        | -7.6           | 18 |      | 10        | 150   | -42        | -7.4           | 17 |
|      | 11        | 200   | -42        | -8.4           | 25 |      | 11        | 140   | -48        | -8.4           | 19 |      | 11        | 180   | -48        | -9.1           | 25 |
|      | 12        | 290   | -39        | -7.8           | 23 |      | 12        | 240   | -44        | -8.8           | 26 |      | 12        | 180   | -51        | -9.7           | 27 |
|      | Sum, Mean |       |            |                |    |      | Sum, Mean | 1820  | -57        | -8.9           | 14 |      | Sum, Mean | 1630  | -59        | -9.3           | 15 |
| 1984 | 1         | 120   | -59        | -10.8          | 27 | 1985 | 1         | 90    | -41        | -9.1           | 32 | 1986 | 1         | 100   | -45        | -9.4           | 30 |
|      | 2         | 100   | -69        | -11.3          | 21 |      | 2         | 100   | -59        | -9.2           | 15 |      | 2         | 110   | -65        | -11.1          | 24 |
|      | 3         | 100   | -63        | -10.0          | 17 |      | 3         | 110   | -60        | -9.5           | 16 |      | 3         | 100   | -61        | -9.6           | 16 |
|      | 4         | 120   | -81        | -11.0          | 7  |      | 4         | 120   | -66        | -9.3           | 8  |      | 4         | 180   | -49        | -7.2           | 9  |
|      | 5         | 100   | -65        | -9.0           | 7  |      | 5         | 140   | -48        | -7.4           | 11 |      | 5         | 150   | -43        | -6.5           | 9  |
|      | 6         | 100   | -56        | -7.8           | 6  |      | 6         | 100   | -104       | -13.8          | 6  |      | 6         | 70    | -72        | -9.8           | 6  |
|      | 7         | 170   | -58        | -7.9           | 5  |      | 7         | 260   | -67        | -9.2           | 7  |      | 7         | 230   | -64        | -9.0           | 8  |
|      | 8         | 110   | -57        | -8.1           | 8  |      | 8         | 90    | -72        | -10.2          | 10 |      | 8         | 160   | -68        | -9.4           | 7  |
|      | 9         | 220   | -54        | -8.0           | 10 |      | 9         | 290   | -58        | -9.2           | 16 |      | 9         | 220   | -54        | -8.0           | 10 |
|      | 10        | 210   | -39        | -7.4           | 20 |      | 10        | 220   | -43        | -7.2           | 15 |      | 10        | 140   | -29        | -6.0           | 19 |
|      | 11        | 110   | -32        | -6.8           | 22 |      | 11        | 320   | -52        | -9.8           | 26 |      | 11        | 260   | -36        | -7.6           | 25 |
|      | 12        | 110   | -52        | -9.7           | 26 |      | 12        | 140   | -50        | -9.7           | 28 |      | 12        | 120   | -36        | -7.4           | 23 |
|      | Sum, Mean | 1570  | -56        | -8.8           | 14 |      | Sum, Mean | 1980  | -58        | -9.3           | 16 |      | Sum, Mean | 1840  | -51        | -8.2           | 15 |
| 1987 | 1         | 180   | -58        | -10.2          | 24 | 1988 | 1         | 160   | -38        | -8.1           | 27 | 1989 | 1         | 140   | -71        | -10.7          | 15 |
|      | 2         | 120   | -31        | -6.5           | 21 |      | 2         | 100   | -45        | -9.1           | 28 |      | 2         | 100   | -77        | -11.9          | 18 |
|      | 3         | 150   | -63        | -9.7           | 15 |      | 3         | 70    | -62        | -10.1          | 19 |      | 3         | 140   | -51        | -8.3           | 15 |
|      | 4         | 70    | -42        | -6.7           | 12 |      | 4         | 190   | -53        | -8.2           | 13 |      | 4         | 250   | -71        | -10.3          | 11 |
|      | 5         | 170   | -58        | -8.0           | 6  |      | 5         | 100   | -73        | -10.3          | 9  |      | 5         | 60    | -45        | -6.4           | 6  |
|      | 6         | 60    | -85        | -11.1          | 4  |      | 6         | 100   | -64        | -8.4           | 3  |      | 6         | 100   | -68        | -9.0           | 4  |
|      | 7         | 350   | -58        | -8.2           | 8  |      | 7         | 80    | -60        | -7.8           | 2  |      | 7         | 60    | -70        | -9.8           | 8  |
|      | 8         | 620   | -51        | -7.2           | 7  |      | 8         | 190   | -63        | -9.1           | 10 |      | 8         | 190   | -54        | -7.6           | 7  |
|      | 9         | 170   | -34        | -5.9           | 13 |      | 9         | 150   | -69        | -9.5           | 7  |      | 9         | 460   | -65        | -9.3           | 9  |
|      | 10        | 90    | -43        | -7.4           | 16 |      | 10        | 190   | -49        | -8.1           | 16 |      | 10        | 140   | -57        | -9.2           | 17 |
|      | 11        | 220   | -35        | -7.1           | 22 |      | 11        | 190   | -47        | -9.1           | 26 |      | 11        | 290   | -35        | -7.0           | 21 |
|      | 12        | 160   | -40        | -8.9           | 31 |      | 12        | 160   | -38        | -8.1           | 27 |      | 12        | 120   | -44        | -8.7           | 26 |
|      | Sum, Mean | 2360  | -50        | -7.9           | 13 |      | Sum, Mean | 1680  | -54        | -8.7           | 17 |      | Sum, Mean | 2050  | -58        | -9.0           | 14 |
| 1990 | 1         | 150   | -55        | -10.5          | 29 | 1991 | 1         | 90    | -60        | -10.7          | 26 | 1992 | 1         | 140   | -47        | -9.3           | 27 |
|      | 2         | 70    | -57        | -8.2           | 9  |      | 2         | 150   | -74        | -12.0          | 22 |      | 2         | 120   | -47        | -9.3           | 27 |
|      | 3         | 100   | -64        | -10.3          | 18 |      | 3         | 70    | -56        | -9.2           | 18 |      | 3         | 120   | -98        | -14.0          | 14 |
|      | 4         | 140   | -56        | -8.1           | 9  |      | 4         | 120   | -50        | -7.5           | 10 |      | 4         | 170   | -63        | -9.4           | 12 |
|      | 5         | 80    | -55        | -7.8           | 7  |      | 5         | 170   | -43        | -6.3           | 7  |      | 5         | 240   | -43        | -6.9           | 12 |
|      | 6         | 350   | -78        | -10.5          | 6  |      | 6         | 280   | -53        | -7.5           | 7  |      | 6         | 70    | -62        | -8.4           | 5  |
|      | 7         | 340   | -44        | -6.3           | 6  |      | 7         | 470   | -61        | -8.6           | 8  |      | 7         | 110   | -57        | -7.8           | 5  |
|      | 8         | 190   | -43        | -6.3           | 7  |      | 8         | 210   | -58        | -8.5           | 10 |      | 8         | 280   | -52        | -7.6           | 9  |
|      | 9         | 320   | -55        | -7.9           | 8  |      | 9         | 190   | -64        | -9.4           | 11 |      | 9         | 170   | -46        | -7.1           | 11 |
|      | 10        | 180   | -62        | -9.3           | 12 |      | 10        | 280   | -48        | -8.2           | 18 |      | 10        | 160   | -48        | -8.2           | 18 |
|      | 11        | 240   | -48        | -8.2           | 18 |      | 11        | 300   | -39        | -8.0           | 25 |      | 11        | 200   | -32        | -6.6           | 21 |
|      | 12        | 200   | -30        | -6.8           | 24 |      | 12        | 150   | -42        | -8.5           | 26 |      | 12        | 180   | -48        | -9.0           | 24 |
|      | Sum, Mean | 2360  | -54        | -8.3           | 12 |      | Sum, Mean | 2480  | -54        | -8.5           | 14 |      | Sum, Mean | 1960  | -51        | -8.4           | 16 |
| 1993 | 1         | 120   | -45        | -8.7           | 25 | 1994 | 1         | 170   | -43        | -9.1           | 29 | 1995 | 1         | 140   | -54        | -10.7          | 32 |
|      | 2         | 190   | -69        | -11.3          | 21 |      | 2         | 130   | -72        | -11.1          | 17 |      | 2         | 60    | -50        | -9.1           | 23 |
|      | 3         | 110   | -64        | -10.4          | 19 |      | 3         | 110   | -54        | -9.2           | 20 |      | 3         | 160   | -70        | -10.9          | 17 |
|      | 4         | 80    | -52        | -8.4           | 15 |      | 4         | 60    | -55        | -7.8           | 7  |      | 4         | 190   | -37        | -6.4           | 14 |
|      | 5         | 180   | -39        | -6.6           | 14 |      | 5         | 140   | -49        | -7.0           | 7  |      | 5         | 170   | -51        | -7.5           | 9  |
|      | 6         | 190   | -64        | -9.2           | 10 |      | 6         | 220   | -58        | -8.3           | 8  |      | 6         | 120   | -77        | -10.4          | 6  |
|      | 7         | 350   | -76        | -10.3          | 6  |      | 7         | 60    | -41        | -6.4           | 10 |      | 7         | 240   | -55        | -7.8           | 7  |
|      | 8         | 220   | -74        | -10.0          | 6  |      | 8         | 190   | -40        | -6.2           | 10 |      | 8         | 540   | -52        | -7.9           | 11 |
|      | 9         | 230   | -62        | -8.7           | 8  |      | 9         | 270   | -43        | -7.2           | 15 |      | 9         | 260   | -48        | -7.7           | 14 |
|      | 10        | 220   | -36        | -6.7           | 18 |      | 10        | 110   | -29        | -6.4           | 22 |      | 10        | 270   | -36        | -7.2           | 22 |
|      | 11        | 270   | -42        | -7.9           | 21 |      | 11        | 130   | -35        | -7.2           | 23 |      | 11        | 190   | -50        | -9.3           | 24 |
|      | 12        | 220   | -42        | -8.4           | 25 |      | 12        | 120   | -51        | -9.8           | 27 |      | 12        | 200   | -56        | -10.2          | 26 |
|      | Sum, Mean | 2380  | -57        | -8.9           | 14 |      | Sum, Mean | 1710  | -47        | -7.9           | 16 |      | Sum, Mean | 2540  | -52        | -8.4           | 15 |
| 1996 | 1         | 80    | -55        | -9.7           | 23 | 1997 | 1         | 110   | -59        | -10.6          | 26 | 1998 | 1         | 120   | -69        | -12.2          | 29 |
|      | 2         | 140   | -39        | -8.4           | 28 |      | 2         | 140   | -43        | -8.1           | 22 |      | 2         | 70    | -56        | -10.0          | 24 |
|      | 3         | 190   | -64        | -10.0          | 16 |      | 3         | 40    | -46        | -7.8           | 16 |      | 3         | 110   | -72        | -11.3          | 18 |
|      | 4         | 110   | -76        | -11.0          | 12 |      | 4         | 120   | -45        | -7.3           | 13 |      | 4         | 120   | -55        | -8.0           | 9  |
|      | 5         | 160   | -67        | -9.8           | 11 |      | 5         | 260   | -50        | -7.4           | 9  |      | 5         | 230   | -52        | -8.0           | 12 |
|      | 6         | 290   | -55        | -8.1           | 10 |      | 6         | 160   | -76        | -10.4          | 7  |      | 6         | 340   | -56        | -8.3           | 10 |
|      | 7         | 180   | -71        | -10.1          | 10 |      | 7         | 140   | -56        | -7.7           | 6  |      | 7         | 160   | -44        | -6.7           | 10 |
|      | 8         | 90    | -47        | -7.3           | 11 |      | 8         | 170   | -44        | -6.4           | 7  |      | 8         | 470   | -81        | -11.8          | 13 |
|      | 9         | 50    | -54        | -7.9           | 9  |      | 9         | 240   | -53        | -7.9           | 10 |      | 9         | 340   | -63        | -9.2           | 11 |
|      | 10        | 210   | -45        | -7.9           | 18 |      | 10        | 340   | -41        | -8.0           | 23 |      | 10        | 280   | -49        | -8.5           | 19 |
|      | 11        | 300   | -51        | -9.3           | 23 |      | 11        | 180   | -53        | -8.6           | 16 |      | 11        | 270   | -42        | -8.8           | 28 |
|      | 12        | 290   | -49        | -10.2          | 33 |      | 12        | 270   | -53        | -9.9           | 26 |      | 12        | 210   | -41        | -8.9           | 30 |
|      | Sum, Mean | 2090  | -55        | -9.2           | 19 |      | Sum, Mean | 2170  | -51        | -8.3           | 15 |      | Sum, Mean | 2720  | -58        | -9.3           | 16 |

(continued)

| Year      | Month | Prec. | δD  | δ <sup>18</sup> O | d  | Year      | Month | Prec. | δD  | δ <sup>18</sup> O | d  | Year      | Month | Prec. | δD  | δ <sup>18</sup> O | d  |
|-----------|-------|-------|-----|-------------------|----|-----------|-------|-------|-----|-------------------|----|-----------|-------|-------|-----|-------------------|----|
| 1999      | 1     | 140   | -46 | -9.2              | 28 | 2000      | 1     | 210   | -47 | -9.3              | 27 | 2001      | 1     | 130   | -72 | -12.0             | 24 |
|           | 2     | 170   | -49 | -9.3              | 25 |           | 2     | 170   | -59 | -11.2             | 30 |           | 2     | 100   | -51 | -9.3              | 24 |
|           | 3     | 170   | -57 | -9.1              | 16 |           | 3     | 160   | -58 | -9.0              | 14 |           | 3     | 130   | -45 | -8.3              | 21 |
|           | 4     | 160   | -75 | -11.0             | 13 |           | 4     | 220   | -65 | -9.8              | 13 |           | 4     | 70    | -42 | -7.0              | 14 |
|           | 5     | 70    | -65 | -9.1              | 8  |           | 5     | 130   | -49 | -7.8              | 13 |           | 5     | 160   | -51 | -7.5              | 9  |
|           | 6     | 130   | -66 | -8.9              | 5  |           | 6     | 180   | -73 | -10.4             | 10 |           | 6     | 190   | -70 | -9.0              | 2  |
|           | 7     | 190   | -55 | -7.7              | 7  |           | 7     | 140   | -72 | -9.7              | 6  |           | 7     | 310   | -45 | -6.7              | 9  |
|           | 8     | 340   | -67 | -9.7              | 11 |           | 8     | 70    | -42 | -6.3              | 9  |           | 8     | 110   | -40 | -5.8              | 7  |
|           | 9     | 240   | -57 | -8.7              | 13 |           | 9     | 290   | -71 | -10.5             | 13 |           | 9     | 220   | -60 | -8.1              | 5  |
|           | 10    | 200   | -47 | -8.3              | 19 |           | 10    | 180   | -65 | -10.6             | 20 |           | 10    | 140   | -57 | -8.5              | 11 |
|           | 11    | 220   | -40 | -8.4              | 27 |           | 11    | 190   | -32 | -6.8              | 22 |           | 11    | 180   | -34 | -7.6              | 26 |
|           | 12    | 280   | -38 | -8.5              | 30 |           | 12    | 150   | -42 | -8.1              | 23 |           | 12    | 130   | -58 | -10.7             | 28 |
| Sum, Mean |       | 2310  | -54 | -9.0              | 18 | Sum, Mean |       | 2090  | -58 | -9.4              | 17 | Sum, Mean |       | 1870  | -53 | -8.2              | 13 |
| 2002      | 1     | 160   | -65 | -11.0             | 23 | 2003      | 1     | 190   | -50 | -9.6              | 27 | 2004      | 1     | 210   | -51 | -9.8              | 27 |
|           | 2     | 90    | -42 | -7.6              | 19 |           | 2     | 120   | -51 | -9.0              | 21 |           | 2     | 110   | -45 | -7.9              | 18 |
|           | 3     | 180   | -73 | -11.0             | 15 |           | 3     | 90    | -70 | -10.8             | 16 |           | 3     | 90    | -43 | -7.6              | 18 |
|           | 4     | 180   | -30 | -5.1              | 11 |           | 4     | 210   | -39 | -6.4              | 12 |           | 4     | 240   | -48 | -7.4              | 11 |
|           | 5     | 110   | -57 | -7.8              | 5  |           | 5     | 50    | -42 | -6.6              | 11 |           | 5     | 210   | -63 | -8.6              | 6  |
|           | 6     | 130   | -72 | -9.8              | 6  |           | 6     | 130   | -66 | -8.9              | 5  |           | 6     | 190   | -55 | -7.5              | 5  |
|           | 7     | 390   | -68 | -9.4              | 7  |           | 7     | 220   | -61 | -8.7              | 9  |           | 7     | 190   | -40 | -5.8              | 6  |
|           | 8     | 360   | -67 | -9.7              | 11 |           | 8     | 230   | -59 | -7.8              | 3  |           | 8     | 290   | -45 | -6.6              | 8  |
|           | 9     | 70    | -53 | -8.3              | 13 |           | 9     | 200   | -40 | -6.4              | 11 |           | 9     | 290   | -47 | -6.9              | 8  |
|           | 10    | 300   | -46 | -7.9              | 17 |           | 10    | 170   | -35 | -7.0              | 21 |           | 10    | 160   | -67 | -10.0             | 13 |
|           | 11    | 340   | -46 | -8.8              | 24 |           | 11    | 150   | -33 | -8.1              | 32 |           | 11    | 160   | -36 | -7.0              | 20 |
|           | 12    | 150   | -42 | -8.9              | 29 |           | 12    | 210   | -53 | -9.5              | 23 |           | 12    | 250   | -58 | -9.9              | 21 |
| Sum, Mean |       | 2460  | -56 | -8.9              | 15 | Sum, Mean |       | 1970  | -50 | -8.2              | 16 | Sum, Mean |       | 2390  | -50 | -7.9              | 13 |

### Misasa (35°21'N, 133°51'E)

| Year      | Month | Prec. | δD  | δ <sup>18</sup> O | d  | Year      | Month | Prec. | δD  | δ <sup>18</sup> O | d  | Year      | Month | Prec. | δD  | δ <sup>18</sup> O | d  |
|-----------|-------|-------|-----|-------------------|----|-----------|-------|-------|-----|-------------------|----|-----------|-------|-------|-----|-------------------|----|
| 1975      | 1     |       |     |                   |    | 1976      | 1     | 200   | -52 | -10.3             | 30 | 1977      | 1     | 80    | -36 | -8.3              | 27 |
|           | 2     |       |     |                   |    |           | 2     | 200   | -41 | -8.4              | 26 |           | 2     | 250   | -52 | -10.5             | 32 |
|           | 3     |       |     |                   |    |           | 3     | 220   | -36 | -7.4              | 23 |           | 3     | 90    | -39 | -7.8              | 23 |
|           | 4     |       |     |                   |    |           | 4     | 80    | -44 | -7.1              | 13 |           | 4     | 150   | -42 | -6.6              | 11 |
|           | 5     |       |     |                   |    |           | 5     | 160   | -33 | -5.5              | 11 |           | 5     | 60    | -32 | -4.9              | 7  |
|           | 6     | 120   | -63 | -9.9              | 16 |           | 6     | 120   | -60 | -8.8              | 10 |           | 6     | 60    |     | -6.0              | 6  |
|           | 7     | 380   | -63 | -9.2              | 11 |           | 7     | 100   | -51 | -7.4              | 8  |           | 7     | 200   |     | -9.9              | 8  |
|           | 8     | 200   | -76 | -11.0             | 12 |           | 8     | 180   | -51 | -7.8              | 11 |           | 8     | 100   |     | -8.6              | 6  |
|           | 9     | 180   | -74 | -10.7             | 12 |           | 9     | 560   | -66 | -9.9              | 13 |           | 9     | 210   |     | -7.0              | 8  |
|           | 10    | 260   | -48 | -7.8              | 14 |           | 10    | 120   | -55 | -8.9              | 16 |           | 10    | 130   |     | -7.6              | 8  |
|           | 11    | 280   | -33 | -7.0              | 23 |           | 11    | 230   | -32 | -6.9              | 23 |           | 11    | 140   |     | -7.8              | 28 |
|           | 12    | 160   | -35 | -7.6              | 26 |           | 12    | 80    | -31 | -7.9              | 32 |           | 12    | 200   |     | -7.6              | 21 |
| Sum, Mean |       |       |     |                   |    | Sum, Mean |       |       |     |                   |    | Sum, Mean |       |       |     |                   |    |

### Shirahama (33°41'N, 135°21'E)

| Year      | Month | Prec. | δD  | δ <sup>18</sup> O | d  | Year      | Month | Prec. | δD  | δ <sup>18</sup> O | d  | Year      | Month | Prec. | δD  | δ <sup>18</sup> O | d  |
|-----------|-------|-------|-----|-------------------|----|-----------|-------|-------|-----|-------------------|----|-----------|-------|-------|-----|-------------------|----|
| 1973      | 1     |       |     |                   |    | 1974      | 1     |       |     |                   |    | 1975      | 1     | 80    | -38 | -7.3              | 20 |
|           | 2     |       |     |                   |    |           | 2     | 150   | -32 | -6.4              | 19 |           | 2     | 90    | -59 | -10.3             | 23 |
|           | 3     |       |     |                   |    |           | 3     | 100   | -24 | -5.6              | 21 |           | 3     | 130   | -28 | -4.5              | 8  |
|           | 4     |       |     |                   |    |           | 4     | 190   | -30 | -4.7              | 8  |           | 4     | 210   | -39 | -6.6              | 14 |
|           | 5     |       |     |                   |    |           | 5     | 100   | -23 | -3.6              | 6  |           | 5     | 90    | -29 | -4.8              | 9  |
|           | 6     |       |     |                   |    |           | 6     | 250   | -47 | -7.4              | 12 |           | 6     | 240   | -59 | -8.5              | 9  |
|           | 7     |       |     |                   |    |           | 7     | 450   | -59 | -8.4              | 8  |           | 7     | 70    | -38 | -6.0              | 10 |
|           | 8     |       |     |                   |    |           | 8     | 300   | -53 | -8.1              | 12 |           | 8     |       |     |                   |    |
|           | 9     | 310   | -70 | -9.8              | 8  |           | 9     | 150   | -30 | -5.6              | 15 |           | 9     |       |     |                   |    |
|           | 10    | 190   | -36 | -5.2              | 6  |           | 10    | 160   | -39 | -6.8              | 15 |           | 10    |       |     |                   |    |
|           | 11    | 20    | -25 | -5.7              | 21 |           | 11    | 100   | -31 | -6.6              | 22 |           | 11    |       |     |                   |    |
|           | 12    | 0     |     |                   |    |           | 12    | 70    | -26 | -6.4              | 25 |           | 12    |       |     |                   |    |
| Sum, Mean |       |       |     |                   |    | Sum, Mean |       |       |     |                   |    | Sum, Mean |       |       |     |                   |    |

### Ibusuki (31°14'N, 130°38'E)

| Year      | Month | Prec. | δD  | δ <sup>18</sup> O | d  | Year      | Month | Prec. | δD  | δ <sup>18</sup> O | d  |
|-----------|-------|-------|-----|-------------------|----|-----------|-------|-------|-----|-------------------|----|
| 1974      | 1     |       |     |                   |    | 1975      | 1     | 130   | -31 | -6.1              | 18 |
|           | 2     |       |     |                   |    |           | 2     | 150   | -24 | -5.8              | 22 |
|           | 3     |       |     |                   |    |           | 3     | 220   | -30 | -5.1              | 11 |
|           | 4     |       |     |                   |    |           | 4     | 300   | -45 | -6.8              | 9  |
|           | 5     |       |     |                   |    |           | 5     | 360   | -59 | -8.7              | 11 |
|           | 6     |       |     |                   |    |           | 6     | 180   | -59 | -8.3              | 7  |
|           | 7     |       |     |                   |    |           | 7     | 180   | -51 | -7.6              | 10 |
|           | 8     | 200   | -35 | -5.5              | 9  |           | 8     |       |     |                   |    |
|           | 9     | 100   | -57 | -8.9              | 14 |           | 9     |       |     |                   |    |
|           | 10    | 60    | -49 | -7.5              | 11 |           | 10    |       |     |                   |    |
|           | 11    | 340   | -30 | -5.3              | 12 |           | 11    |       |     |                   |    |
|           | 12    | 160   | -35 | -6.6              | 18 |           | 12    |       |     |                   |    |
| Sum, Mean |       |       |     |                   |    | Sum, Mean |       |       |     |                   |    |

### Satsuma-Iwojima (30°47'N, 130°18'E)

| Year      | Month | Prec. | δD  | δ <sup>18</sup> O | d  | Year      | Month | Prec. | δD  | δ <sup>18</sup> O | d  |
|-----------|-------|-------|-----|-------------------|----|-----------|-------|-------|-----|-------------------|----|
| 1974      | 1     |       |     |                   |    | 1975      | 1     | 120   | -26 | -6.1              | 23 |
|           | 2     |       |     |                   |    |           | 2     | 120   | -18 | -4.5              | 18 |
|           | 3     |       |     |                   |    |           | 3     | 290   | -31 | -5.2              | 11 |
|           | 4     |       |     |                   |    |           | 4     | 160   | -30 | -4.8              | 8  |
|           | 5     |       |     |                   |    |           | 5     | 160   | -54 | -8.0              | 10 |
|           | 6     |       |     |                   |    |           | 6     | 240   | -55 | -8.1              | 10 |
|           | 7     |       |     |                   |    |           | 7     | 240   | -58 | -8.8              | 12 |
|           | 8     | 60    | -26 | -4.0              | 6  |           | 8     |       |     |                   |    |
|           | 9     | 280   | -55 | -8.5              | 13 |           | 9     |       |     |                   |    |
|           | 10    | 160   | -44 | -6.3              | 6  |           | 10    |       |     |                   |    |
|           | 11    | 190   | -19 | -4.6              | 18 |           | 11    |       |     |                   |    |
|           | 12    | 200   | -36 | -7.5              | 24 |           | 12    |       |     |                   |    |
| Sum, Mean |       |       |     |                   |    | Sum, Mean |       |       |     |                   |    |
